# Supplementary material for: MicroRNA-212/ABCG2-axis contributes to development of imatinib-resistance in leukemic cells
Source: PubMed Central journal article supplement (PMC5696160; doi:10.18632/oncotarget.21272), 2017-09-26
Supplement: oncotarget-08-92018-s001.pdf [file oncotarget-08-92018-s001.pdf]

## MicroRNA-212/ABCG2-axis contributes to development of imatinib-resistance in leukemic cells

### SUPPLEMENTARY MATERIALS

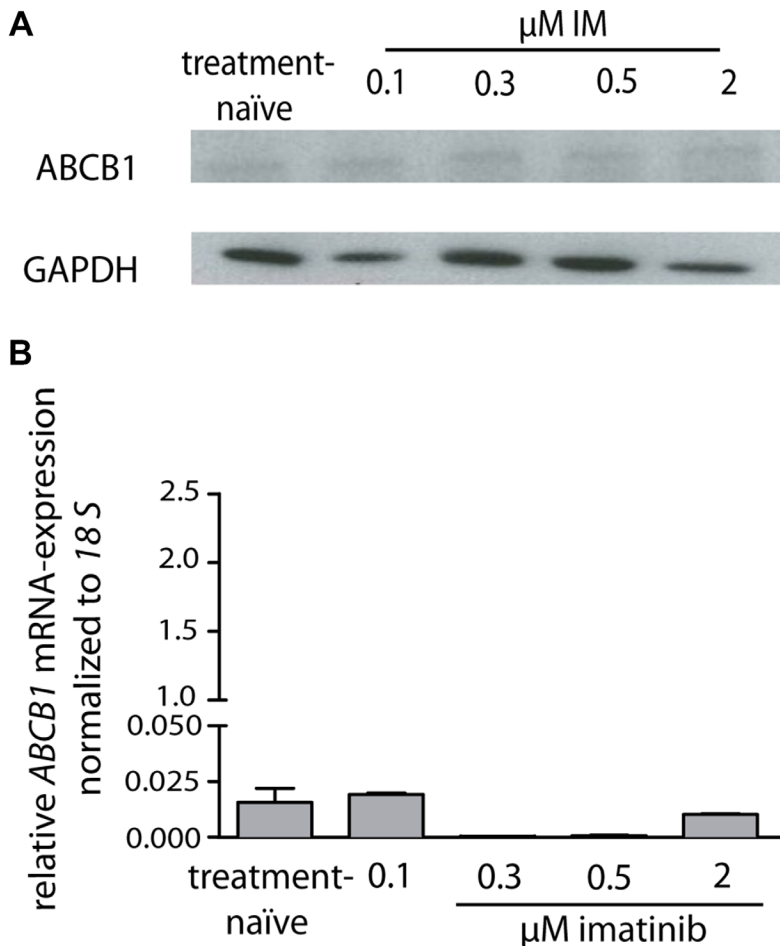

**Supplementary Figure 1: ABCB1 mRNA and protein expression during the development of imatinib-resistance in K-562 cells.** (A) Western blot analysis of ABCB1 protein expression during the development of IM-resistance (0.1, 0.3, 0.5 and 2 μM IM-resistant) compared to protein expression of GAPDH. (B) ABCB1 mRNA expression of treatment-naïve and IM-resistant cells was analyzed using qRT-PCR. The data was normalized to 18S. Analyses were performed in triplicates, *n* = 3. Error bars indicate SD.

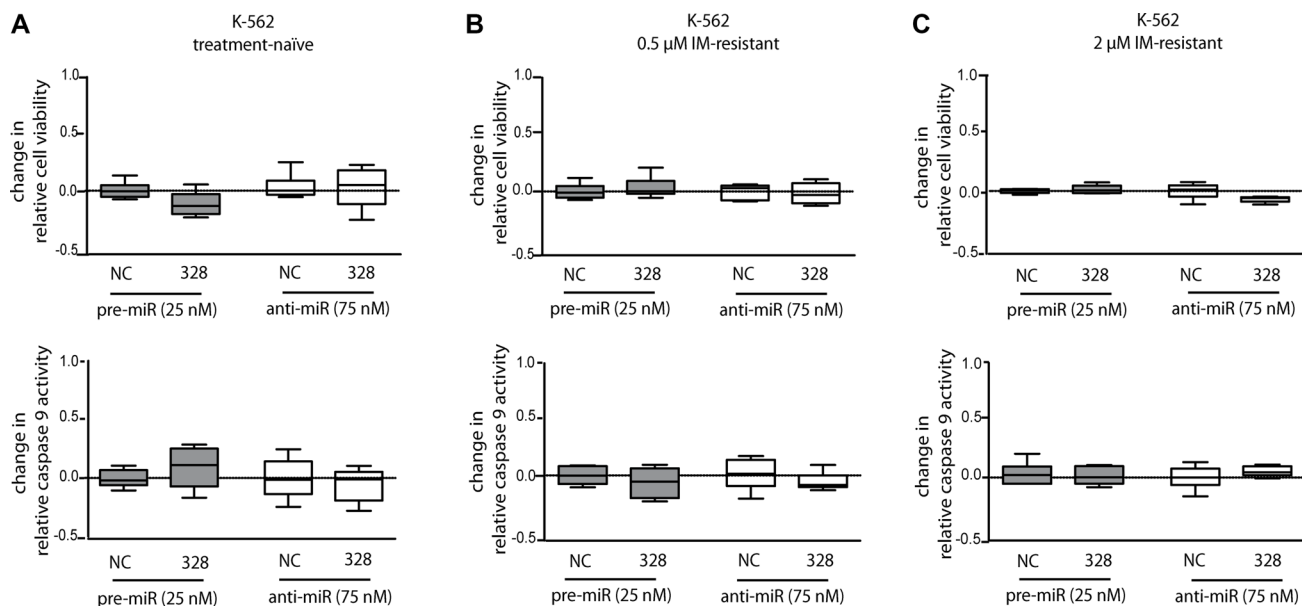

**Supplementary Figure 2: miR-328-dependent changes in imatinib-susceptibility of treatment-naïve or imatinib-resistant K-562 cells with subsequent analysis of cell viability and apoptosis.** K-562 cells, treatment-naïve (A) and two resistant sublines (0.5 (B), 2  $\mu$ M (C) IM) were transfected with 25 nM miR-mimic pre-miR-328 or 75 nM miR-inhibitor anti-miR-328 and incubated with 2  $\mu$ M imatinib for 48 h. Analyses of cell viability using WST-1 assay (upper panels) and apoptosis using luminescent caspase 9 glo assay (lower panels) after pre-miR-212 transfection and anti-miR-212 transfection are represented normalized to negative control transfected cells. Analyses were performed in three independent experiments. Data are normalized to respective negative control transfected cells. Error bars indicate SD, statistical analysis was performed using student's *t*-test

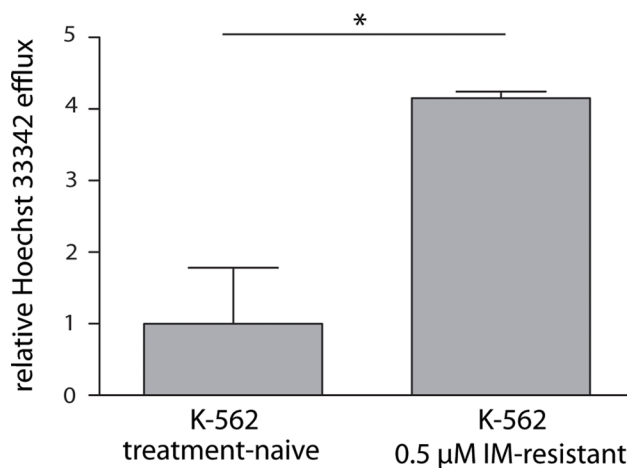

**Supplementary Figure 3: ABCG2-mediated transport of treatment-naïve and 0.5  $\mu$ M IM-resistance K-562 cells.** ABCG2-dependent transport of treatment-naïve and 0.5  $\mu$ M IM-resistant cells was investigated by analyzing Hoechst 33342 fluorescence in supernatant after 30 min incubation. Data were normalized to treatment-naïve cells. Analyses were performed in three independent experiments. Error bars indicate SD, statistical analysis was performed using student's *t*-test (\* $p$  < 0.05).

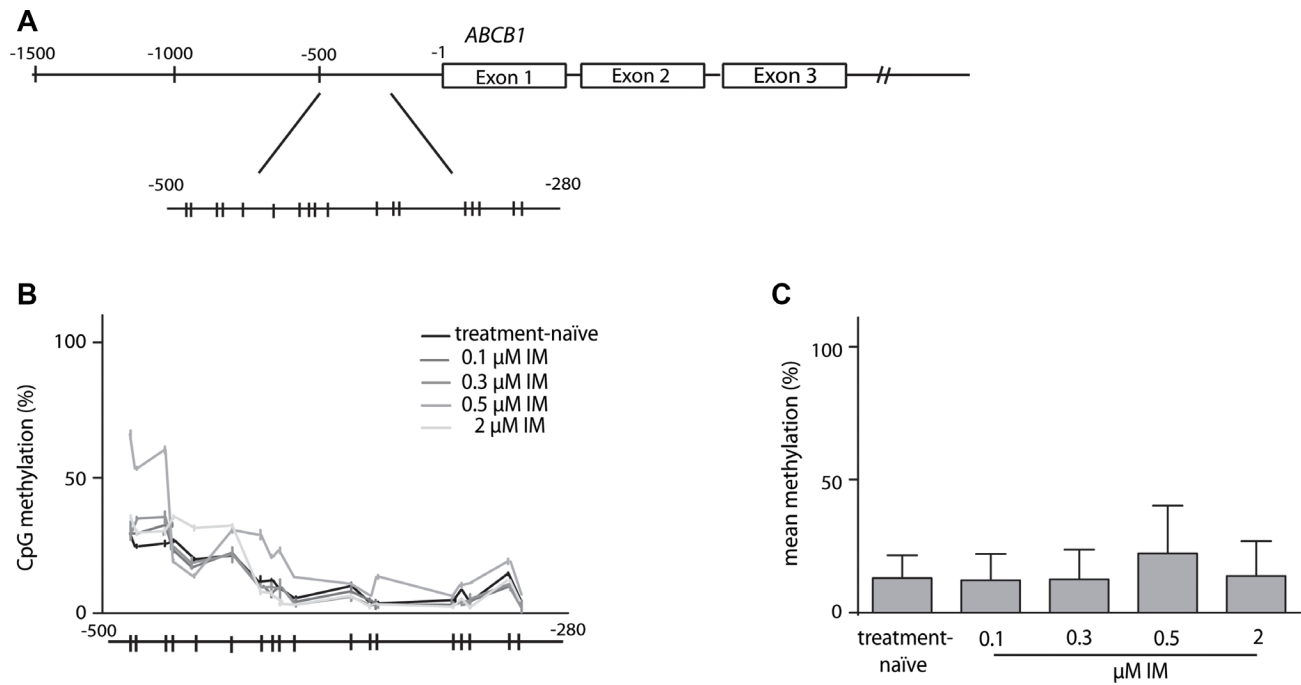

**Supplementary Figure 4: Analyses of methylation in *ABCB1* promoter.** (A) Graphical overview of the *ABCB1* promoter. Methylation of 18 CpGs in a region between -500 and -280 bp upstream the transcription start were analyzed using bisulfite-sequencing. Every line indicates one CpG. (B) Comparison of *ABCB1* promoter methylation between treatment-naïve and IM-resistant sublines, shown as progression chart of all measured CpGs. (C) CpG mean methylation in treatment-naïve and IM-resistant sublines. Analyses were performed in three independent experiments; error bars indicate SD, statistical analysis was performed using one-way ANOVA and Dunnet's test.

**Supplementary Table 1: Primer used for bisulfite sequencing**

| Primer name           | Primer-sequence (5'→ 3')        | No. and position of CpGs analyzed | Annealing temperature |
|-----------------------|---------------------------------|-----------------------------------|-----------------------|
| ABCG2_forward         | TGGGATTTAAATAAAAAGATTTAATGGT    |                                   | 50°                   |
| ABCG2_reverse         | ACCTTTACATTA AACCTAACTCTTTAT    |                                   |                       |
| ABCG2_forward_nested  | AATAAAAAGATTTAATGGTTTTAGTT      |                                   | 48°                   |
| ABCG2_reverse_nested  | ACATTA AACCTAACTCTTTATT         |                                   |                       |
| ABCG2_sequencing1     | AAATAAAAAGATTTAATGGTTTTAG       | 1 (chr4:89152554)                 |                       |
| ABCG2_sequencing2     | AGGGGGAAAGTTATATG               | 2 (chr4:89152647-89152649)        |                       |
| ABCG2_sequencing3     | GGATTATGATATAATTTGAAAAGGA       | 1 (chr4:89152864)                 |                       |
| miR212_forward        | GGGGTTTTTGAGTTATTTTTTAGGAAA     |                                   | 53°                   |
| miR212_reverse        | ATATCCCAAAAAAAAAACTT            |                                   |                       |
| miR212_forward_nested | AAGTGAGGAGAAGGTGTT              |                                   | 52°                   |
| miR212_reverse_nested | CCCCCATCCTAAAAAAAAACA ACTC      |                                   |                       |
| miR212_sequencing1    | AAGTGAGGAGAAGGTGTT              | 6 (chr17:1954106-1954065)         |                       |
| miR212_sequencing2    | TTTTTTTAGGTAGGTT                | 7 (chr17:1953933- 1953868)        |                       |
| ABCB1_forward         | GGATAGTGTGAAGTTTTTTGGTAAG       |                                   | 50°                   |
| ABCB1_reverse         | AACACTACAAAAACTTTCCTATAC        |                                   |                       |
| ABCB1_forward_nested  | TGGGGTTAGATTTAGATTTAGGAGT       |                                   | 56°                   |
| ABCB1_reverse_nested  | CAACATCTCCACCAAAACAAAATTA AAAAT |                                   |                       |
| ABCB1_sequencing1     | GTAGTGGTATTGGATTATG             | 6 (chr7:87229856- 87229836)       |                       |
| ABCB1_sequencing2     | GGGATTTGTTTTTTGAGT              | 7 (chr7:87229810- 87229775)       |                       |
| ABCB1_sequencing3     | GGAATCGGGAGGGAGA                | 5 (chr7:87229752- 87229723)       |                       |
